# Supplementary material for: Identification of Novel Reference Genes Suitable for qRT-PCR Normalization with Respect to the Zebrafish Developmental Stage
Source: PLoS One. 2016 Feb 18;11(2):e0149277. doi: 10.1371/journal.pone.0149277 (PMC4758726; doi:10.1371/journal.pone.0149277)
Supplement: S4 Table — (XLSX) [file pone.0149277.s007.xlsx]

## Sheet: Sheet1
S4 Table. Numbers of possible pseudogenes of the studied genes
Gene	ssr2	mobk13	C1H16orf72	lsm12b	actb2	actb1
Number of PGs	6	8	15	19	56	63
